# Supplementary material
Source: MDPI journal article supplement (https://www.mdpi.com/1999-4907/10/12/1124)
Supplement: s1 [file s1]

# Supplementary Material

**Table S1.** Statistical test of the effects of different research sites, season, and their interactions on soil water content and soil microbial biomass based on two-factor AVOVA.

| Index              | Site   | Season | Site × Season |
|--------------------|--------|--------|---------------|
| Soil water content | <0.001 | <0.001 | 0.014         |
| MBC                | <0.001 | 0.001  | 0.573         |
| MBN                | <0.001 | <0.001 | 0.421         |

**Table S2.** Statistical test of the effects of research sites, season, and their interactions on absolute abundance of PLFAs (nmol g<sup>-1</sup> soil), ratios of F/B and G+/G- in November 2016 and June 2017.

| Source        | The Absolute Abundances of PLFAs (nmol g <sup>-1</sup> soil) |        |        |        |             |        |        |
|---------------|--------------------------------------------------------------|--------|--------|--------|-------------|--------|--------|
|               | B                                                            | G+     | G-     | F      | Total PLFAs | F/B    | G+/G-  |
| Site          | <0.001                                                       | <0.001 | <0.001 | <0.001 | <0.001      | <0.001 | 0.100  |
| Season        | 0.026                                                        | 0.051  | 0.001  | 0.026  | 0.009       | 0.108  | 0.147  |
| Site × Season | 0.099                                                        | 0.183  | 0.014  | 0.025  | 0.155       | <0.001 | <0.001 |

**Table S3.** Statistical test of the effects of research site, season, and their interactions on relative abundances PLFAs (mol %) in November 2016 and June 2017.

| Source        | The Relative Abundances PLFAs (mol %) |        |        |        |        |        |
|---------------|---------------------------------------|--------|--------|--------|--------|--------|
|               | B                                     | G+     | G-     | F      | ACT    | AMF    |
| Site          | <0.001                                | <0.001 | <0.001 | <0.001 | <0.001 | <0.001 |
| Season        | <0.001                                | <0.001 | 0.256  | <0.001 | <0.001 | 0.008  |
| Site × Season | <0.001                                | <0.001 | 0.731  | <0.001 | <0.001 | 0.829  |
